# Supplementary material
Source: publisher figshare collection journal article supplement (https://gsapubs.figshare.com/articles/dataset/_/13185029)

Xin-Shui Wang, Reiner Klemd, Jun Gao, Tuo Jiang, and Xi Zhang, 2020, Early Devonian tectonic conversion from contraction to extension in the Chinese Western Tianshan: A response to slab rollback: GSA Bulletin, <https://doi.org/10.1130/B35760.1>.

## Supplemental Material

**Figure S1.** Representative photomicrographs of the dated sedimentary and igneous rocks in the Baluntai domain of the Chinese Western Tianshan. Mineral abbreviations: Pl-plagioclase; Kf-K-feldspar; Bt-biotite; Chl-chlorite; Hbl-hornblende; Ep-epidote; Ls-Lithic fragments; Cb-carbonate.

**Figure S2.** Zircon U–Pb Concordia diagrams for the metamorphosed and unmetamorphosed sedimentary rocks in the Baluntai domain of the Chinese Central Tianshan Block.

**Table S1.** LA-ICP-MS analytical data of zircon grains from the sedimentary rocks in the Baluntai domain of the Chinese Central Tianshan Block.

**Table S2.** Zircon LA-ICP-MS analytical data of the foliated and non-foliated igneous rocks in the Baluntai domain of the Chinese Central Tianshan Block.

**Table S3.** Whole-rock major (wt. %) and trace (ppm) element compositions of the Paleozoic igneous rocks in the Baluntai domain of the Chinese Central Tianshan Block.

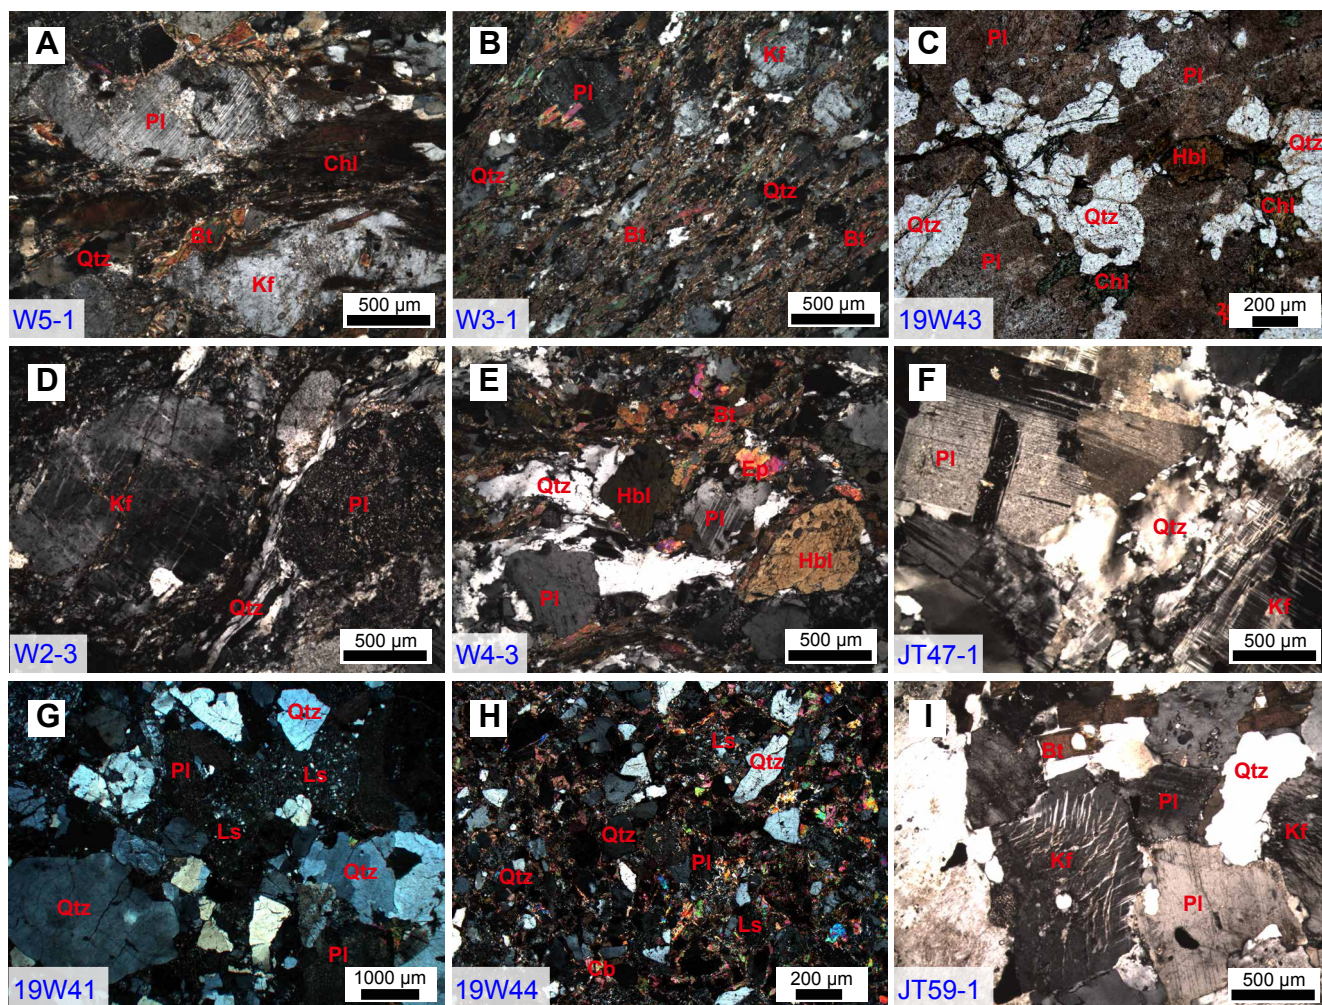

Figure DR1

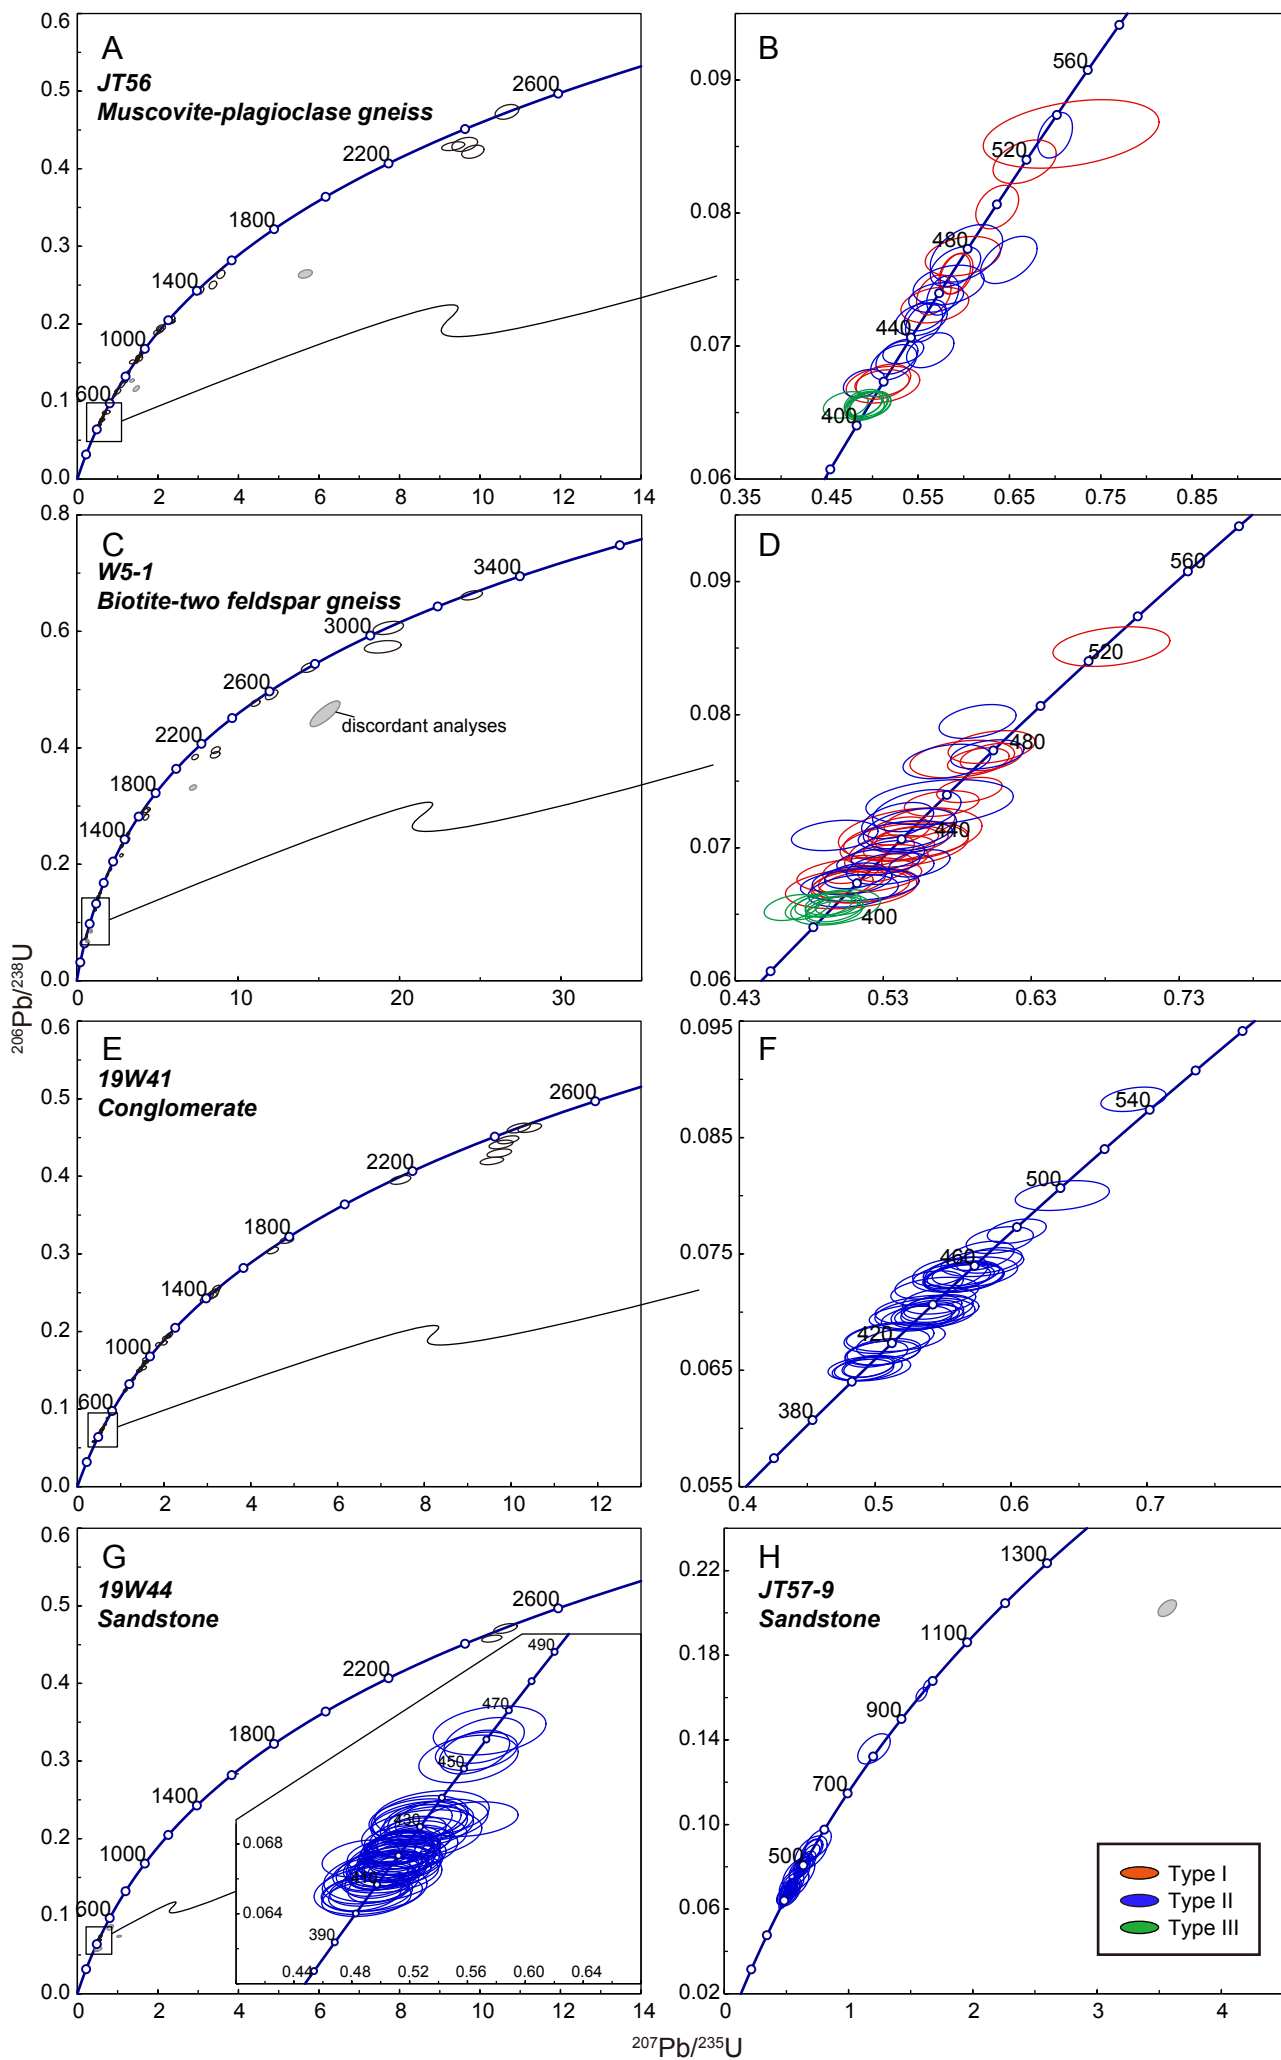

Supplement: Supplementary file 1 [file 1]
