# Supplementary material
Source: publisher figshare collection journal article supplement (https://gsapubs.figshare.com/articles/dataset/_/13185029)
Supplement: Supplementary file 1 [file 1]

## Sheet: Sheet1
Table S1. LA-ICP-MS analytical data of zircon grains from the sedimentary rocks in the Baluntai domain of the Chinese Central Tianshan Block.
Type	Spot	Th	U	Th/U	Isotopic ratios						Age (Ma)						Concordance*	Preferred age#	1σ
		ppm	ppm		207Pb/206Pb	1σ	207Pb/235U	1σ	206Pb/238U	1σ	207Pb/206Pb	1σ	207Pb/235U	1σ	206Pb/238U	1σ		(Ma)	(Ma)
JT56 Muscovite-plagioclase gneiss (GPS: N42°49’47”, E86°21’01”)
II	1	41.7974	1936.78	0.0215808	0.0558223	0.00151179	0.557761	0.0150288	0.0723164	0.000772581	455.6	61.105	450.068	9.80086	450.096	4.65086	99.9938	450.096	4.65086
II	2	11.4391	1137.41	0.0100572	0.0554714	0.00154291	0.533807	0.0147649	0.069593	0.000607991	431.53	65.735	434.333	9.77884	433.703	3.67182	100.145	433.703	3.67182
II	3	487.929	246.5	1.97943	0.0685669	0.00185853	1.19303	0.0330227	0.125879	0.00133569	887.035	57.4075	797.366	15.2993	764.31	7.65885	104.325	764.31	7.65885
II	4	47.8142	599.724	0.079727	0.0611767	0.00160933	0.649382	0.0204285	0.0764736	0.00117082	655.57	57.3975	508.098	12.5808	475.039	7.01612	106.959	475.039	7.01612
I	5	130.821	241.63	0.541411	0.0567195	0.00255074	0.568366	0.0245279	0.0730863	0.000885803	479.67	93.51	456.957	15.8827	454.723	5.327	100.491	454.723	5.327
III	6	5.60471	637.223	0.00879553	0.054854	0.00181838	0.495464	0.0163715	0.0655368	0.000649474	405.605	74.065	408.627	11.1193	409.21	3.93547	99.8576	409.21	3.93547
I	7	114.434	185.493	0.616914	0.0567522	0.00255675	0.59904	0.02721	0.0767592	0.000978192	483.375	99.9875	476.625	17.2813	476.75	5.86196	99.9737	476.75	5.86196
I	8	186.723	413.586	0.451474	0.0574697	0.00186978	0.666714	0.0228455	0.0838554	0.00108219	509.3	76.8425	518.713	13.9222	519.094	6.44258	99.9265	519.094	6.44258
III	9	8.75263	651.125	0.0134423	0.0542327	0.00149276	0.491382	0.0143154	0.0653397	0.000600698	388.94	62.9575	405.852	9.75035	408.017	3.64152	99.4692	408.017	3.64152
II	10	18.7525	563.779	0.0332622	0.0898782	0.00215052	1.4639	0.0509291	0.116565	0.00242872	1433.34	78.5475	915.617	20.9973	710.762	14.0273	128.822	Discordant
III	11	10.5988	748.574	0.0141587	0.0546237	0.00162702	0.495216	0.014626	0.0656309	0.000634033	398.2	66.66	408.459	9.93619	409.779	3.84189	99.6777	409.779	3.84189
I	12	432.928	631.557	0.685494	0.0833664	0.00197759	2.34085	0.0561508	0.202804	0.0016619	1279.63	46.295	1224.78	17.0862	1190.37	8.93009	102.891	1279.63	46.295
II	13	186.531	512.049	0.364284	0.0561976	0.00165534	0.591004	0.0182034	0.0759754	0.000990799	461.155	64.8075	471.508	11.6219	472.056	5.94157	99.8841	472.056	5.94157
I	14	159.27	668.9	0.238107	0.157046	0.00311087	9.334	0.189378	0.429029	0.00371188	2424.38	33.6375	2371.37	18.6774	2301.34	16.7905	103.043	2424.38	33.6375
II	15	196.489	307.166	0.639683	0.0560466	0.00198991	0.569793	0.019806	0.0736497	0.000735032	453.75	79.6225	457.881	12.8148	458.106	4.42021	99.9507	458.106	4.42021
II	16	145.639	733.878	0.198452	0.054928	0.00163385	0.523411	0.016619	0.0687784	0.000875578	409.31	66.66	427.427	11.0807	428.791	5.28619	99.6819	428.791	5.28619
II	17	193.191	1213.84	0.159157	0.0769681	0.00188239	1.35831	0.036731	0.126933	0.00145402	1120.37	48.1475	871.142	15.8258	770.345	8.32786	113.085	Discordant
I	18	98.1929	251.113	0.391031	0.0651764	0.00216293	1.36229	0.044655	0.151043	0.0016624	788.89	70.3625	872.857	19.2032	906.807	9.32311	96.2561	906.807	9.32311
II	19	15.1614	379.957	0.039903	0.055903	0.00215067	0.603031	0.0261483	0.0769717	0.00142654	450.045	85.1775	479.155	16.5659	478.021	8.54272	100.237	478.021	8.54272
I	20	181.438	264.85	0.685062	0.0551459	0.00214006	0.512054	0.0197091	0.0673192	0.000871464	416.715	87.0275	419.829	13.2383	419.984	5.26837	99.9631	419.984	5.26837
II	21	318.128	1720.93	0.184858	0.0579608	0.00152534	0.563326	0.0171156	0.0696838	0.000865207	527.815	52.77	453.689	11.1209	434.251	5.21941	104.476	434.251	5.21941
III	22	28.433	1105.1	0.025729	0.053841	0.00145808	0.490411	0.0131986	0.0656388	0.000621743	364.87	65.735	405.191	8.99612	409.827	3.76764	98.8686	409.827	3.76764
I	23	285.72	334.186	0.854971	0.0549428	0.00218106	0.510597	0.0196611	0.0672108	0.000663186	409.31	88.88	418.851	13.2187	419.33	4.01232	99.8857	419.33	4.01232
III	24	6.2814	621.346	0.0101093	0.0517125	0.00181429	0.470816	0.0161714	0.0655699	0.000658333	272.285	79.6175	391.752	11.1671	409.41	3.98887	95.687	409.41	3.98887
III	25	4.78424	548.986	0.00871469	0.0545081	0.00159757	0.494987	0.0139503	0.0655129	0.000706869	390.79	66.66	408.303	9.47898	409.065	4.2823	99.8137	409.065	4.2823
I	26	90.4662	687.357	0.131615	0.0638143	0.00177389	1.11586	0.0491476	0.122603	0.00318752	744.45	59.2525	760.992	23.5912	745.53	18.3084	102.074	745.53	18.3084
II	27	5.86027	1073.53	0.00545889	0.0552092	0.00194347	0.553411	0.0188328	0.0720145	0.000819042	420.42	79.6225	447.229	12.3138	448.281	4.93114	99.7653	448.281	4.93114
II	28	24.0934	1293.66	0.0186242	0.0546582	0.00149623	0.52687	0.0151496	0.0691363	0.000821143	398.2	56.475	429.73	10.0789	430.95	4.95659	99.7169	430.95	4.95659
I	29	71.8404	174.948	0.410639	0.0548301	0.00292875	0.511582	0.0265871	0.0671017	0.000911083	405.605	120.36	419.513	17.8618	418.671	5.50854	100.201	418.671	5.50854
II	30	10.4195	676.059	0.0154122	0.0561251	0.00247032	0.583529	0.0256509	0.0745835	0.00098899	457.45	93.51	466.727	16.4508	463.711	5.93822	100.65	463.711	5.93822
I	31	240.232	402.293	0.597155	0.0749697	0.00205759	1.97953	0.0549647	0.189372	0.0022006	1133.34	54.475	1108.56	18.7463	1117.97	11.9425	99.1582	1133.34	54.475
III	32	7.56687	736.953	0.0102678	0.0545017	0.0016236	0.497817	0.0147871	0.0655921	0.000666989	390.79	66.66	410.224	10.0282	409.544	4.04108	100.166	409.544	4.04108
III	33	9.48128	996.414	0.00951541	0.0536897	0.00157769	0.490493	0.014093	0.0657393	0.000655798	366.72	66.66	405.246	9.60467	410.435	3.97296	98.7357	410.435	3.97296
II	34	72.3926	520.944	0.138964	0.0635215	0.00315665	1.00053	0.0500062	0.113185	0.00228248	725.62	105.545	704.081	25.3855	691.219	13.223	101.861	691.219	13.223
II	35	5.92571	644.059	0.00920056	0.0526144	0.00163817	0.490798	0.0149068	0.0672036	0.000686176	322.28	74.9925	405.454	10.1567	419.286	4.15101	96.7011	419.286	4.15101
I	36	590.32	619.28	0.953236	0.09121	0.00137	3.06178	0.0519	0.24342	0.00321	1451	15	1423	13	1404	17	101.353	1451	15
I	37	183.87	555.48	0.331011	0.15534	0.00379	5.66253	0.11472	0.26439	0.00359	2406	42	1926	17	1512	18	127.381	Discordant
I	38	58.05	292.84	0.198231	0.06154	0.00107	0.91698	0.01743	0.10805	0.00144	658	20	661	9	661	8	100	661	8
I	39	95.14	385.13	0.247033	0.07085	0.00116	1.59067	0.02888	0.1628	0.00216	953	18	967	11	972	12	99.4856	972	12
II	40	72.82	898.85	0.0810146	0.05912	0.00096	0.69996	0.0126	0.08585	0.00113	572	19	539	8	531	7	101.507	531	7
II	41	52.19	696.96	0.0748823	0.06665	0.00145	1.20422	0.02748	0.13102	0.0018	827	26	803	13	794	10	101.134	794	10
I	42	43.22	409.75	0.105479	0.06951	0.00112	1.49983	0.02677	0.15647	0.00207	914	17	930	11	937	12	99.2529	937	12
I	43	115.82	236.8	0.489105	0.05738	0.00133	0.63664	0.01548	0.08045	0.00108	506	31	500	10	499	6	100.2	499	6
I	44	245.18	429.87	0.570358	0.05673	0.00101	0.59005	0.01146	0.07542	0.001	481	21	471	7	469	6	100.426	469	6
I	45	83.46	144.27	0.578499	0.07748	0.00295	2.07806	0.07323	0.19453	0.00278	1134	78	1142	24	1146	15	99.651	1134	78
I	46	106.81	203.97	0.523655	0.06686	0.00132	1.26289	0.02667	0.13696	0.00183	833	23	829	12	827	10	100.242	827	10
II	47	184.81	328.22	0.563067	0.05624	0.00129	0.55655	0.0134	0.07176	0.00096	462	30	449	9	447	6	100.447	447	6
I	48	184.15	232.51	0.792009	0.0557	0.00115	0.56724	0.01249	0.07384	0.00099	440	26	456	8	459	6	99.3464	459	6
I	49	136.59	325.07	0.420186	0.07215	0.00121	1.68197	0.0312	0.16904	0.00224	990	18	1002	12	1007	12	99.5035	990	18
I	50	153.37	443.6	0.345739	0.07042	0.00115	1.47828	0.02678	0.15222	0.00202	941	18	922	11	913	11	100.986	913	11
I	51	148.96	513.73	0.289958	0.08326	0.00134	2.36136	0.04232	0.20565	0.00272	1275	17	1231	13	1206	15	102.073	1275	17
I	52	131.28	248.98	0.527271	0.06998	0.0013	1.48387	0.02991	0.15375	0.00206	928	21	924	12	922	12	100.217	922	12
I	53	157.3	652.98	0.240896	0.16886	0.00387	9.82335	0.18325	0.42191	0.0056	2546	39	2418	17	2269	25	106.567	2546	39
I	54	654.85	444.88	1.47197	0.0569	0.00105	0.59221	0.01182	0.07546	0.00101	488	22	472	8	469	6	100.64	469	6
I	55	197.86	262.12	0.754845	0.06618	0.00119	1.23383	0.02409	0.13518	0.00181	812	20	816	11	817	10	99.8776	817	10
I	56	140.61	226.8	0.619974	0.06563	0.00136	1.17134	0.02584	0.12943	0.00174	795	25	787	12	785	10	100.255	785	10
I	57	182.44	210.53	0.866575	0.09798	0.00165	3.56454	0.06605	0.26381	0.00352	1586	17	1542	15	1509	18	102.187	1586	17
II	58	74.43	252.45	0.294831	0.07782	0.00222	2.06507	0.05191	0.19246	0.0026	1142	58	1137	17	1135	14	100.176	1142	58
I	59	204.99	363.71	0.563608	0.06941	0.00119	1.49006	0.02814	0.15567	0.00207	911	19	926	11	933	12	99.2497	933	12
I	60	91.17	147.26	0.619109	0.06056	0.0055	0.71762	0.06355	0.08595	0.0017	624	203	549	38	532	10	103.195	532	10
I	61	489.33	556.81	0.87881	0.09764	0.00165	3.36803	0.06285	0.25012	0.00333	1580	17	1497	15	1439	17	104.031	1580	17
I	62	140.9	268.01	0.525727	0.16175	0.0042	9.62043	0.21133	0.43136	0.00595	2474	45	2399	20	2312	27	103.763	2474	45
I	63	125.8	347.21	0.362317	0.16347	0.00269	10.6697	0.19506	0.47329	0.00628	2492	15	2495	17	2498	27	99.8799	2492	15
I	64	146.38	524.18	0.279255	0.06276	0.00116	0.94985	0.019	0.10975	0.00146	700	22	678	10	671	8	101.043	671	8
I	65	93.34	305.78	0.305252	0.07208	0.00231	1.54497	0.05005	0.15542	0.00233	988	42	948	20	931	13	101.826	931	13
I	66	174.64	630.73	0.276886	0.07141	0.00126	1.57505	0.03043	0.15993	0.00213	969	20	960	12	956	12	100.418	956	12
II	67	22.08	918.28	0.024045	0.05669	0.00104	0.57701	0.01154	0.07381	0.00098	479	22	463	7	459	6	100.871	459	6
W5-1 Biotite-two feldspar gneiss (GPS: N42°45’47”, E86°19’59”)
I	1	101.325	158.202	0.640477	0.193518	0.00425921	14.4123	0.327048	0.538058	0.00555745	2772.53	36.88	2777.24	21.6289	2775.31	23.3409	100.07	2772.53	36.88
III	2	35.4578	1096.57	0.0323353	0.0550439	0.00138824	0.496576	0.0127403	0.0651617	0.000584062	413.01	55.55	409.382	8.64842	406.94	3.5416	100.6	406.94	3.5416
II	3	605.723	333.857	1.81432	0.0553455	0.00199272	0.526707	0.0185858	0.0689305	0.000654596	433.38	81.4725	429.622	12.3645	429.709	3.95449	99.9797	429.709	3.95449
I	4	125.967	905.105	0.139174	0.0560932	0.00127201	0.594235	0.0137472	0.0765285	0.00064199	457.45	49.995	473.568	8.76162	475.368	3.85289	99.6214	475.368	3.85289
I	5	69.056	1545.82	0.0446727	0.0560211	0.00120569	0.53135	0.01221	0.0685027	0.000688422	453.75	48.1425	432.705	8.10138	427.128	4.15974	101.306	427.128	4.15974
I	6	72.3236	257.63	0.280727	0.0911354	0.00190223	3.1741	0.0668124	0.252067	0.00231778	1450.01	39.66	1450.88	16.2825	1449.13	11.959	100.121	1450.01	39.66
II	7	310.195	187.062	1.65825	0.0558712	0.00289797	0.514166	0.0264699	0.0672205	0.000798813	455.6	119.433	421.247	17.7527	419.388	4.83045	100.443	419.388	4.83045
III	8	8.141	793.691	0.0102571	0.0548681	0.00134087	0.497191	0.0126101	0.0653918	0.00063518	405.605	55.55	409.799	8.5566	408.333	3.84964	100.359	408.333	3.84964
II	9	25.6575	764.559	0.0335585	0.0563667	0.00152271	0.600299	0.0163322	0.0770133	0.000720957	477.82	59.2525	477.424	10.3678	478.271	4.32298	99.8229	478.271	4.32298
II	10	371.167	673.324	0.551245	0.0754335	0.00176972	1.90177	0.0454379	0.182088	0.00170854	1079.63	48.15	1081.71	15.9166	1078.37	9.33556	100.309	1079.63	48.15
I	11	118.578	288.855	0.410512	0.110498	0.00265997	4.29331	0.107712	0.280691	0.00327523	1809.26	43.06	1692.08	20.6937	1594.84	16.5085	106.097	1809.26	43.06
II	12	34.5426	826.534	0.041792	0.05439	0.00146207	0.511464	0.0139066	0.0678867	0.00063826	387.09	65.735	419.433	9.34664	423.411	3.8597	99.0604	423.411	3.8597
I	13	148.724	323.689	0.459465	0.177269	0.0034146	12.0736	0.253525	0.491157	0.0055445	2627.47	31.79	2610.14	19.7703	2575.68	24.0097	101.338	2627.47	31.79
I	14	92.7731	133.831	0.693212	0.156969	0.00326402	8.6128	0.181234	0.396096	0.00381204	2433.33	35.4875	2297.91	19.2071	2151.04	17.6402	106.828	2433.33	35.4875
I	15	98.3909	125.615	0.78327	0.0680888	0.00327551	0.644421	0.0297587	0.0688569	0.000830895	872.215	99.9975	505.04	18.3783	429.265	5.01659	117.652	Discordant
I	16	107.171	269.464	0.397717	0.137407	0.00250218	7.33181	0.135152	0.384201	0.00296502	2194.76	32.5625	2152.69	16.5357	2095.88	13.8548	102.711	2194.76	32.5625
I	17	440.308	229.585	1.91785	0.05583	0.00225949	0.517134	0.0202457	0.0670867	0.000810985	455.6	88.88	423.235	13.553	418.58	4.90448	101.112	418.58	4.90448
III	18	33.3837	991.843	0.0336583	0.0541654	0.00130795	0.496041	0.0124064	0.0658305	0.000589094	388.94	53.7	409.019	8.42497	410.987	3.5699	99.5213	410.987	3.5699
I	19	72.7903	204.076	0.356682	0.237277	0.00516236	15.3918	0.613003	0.459797	0.0146338	3101.54	1.39	2839.81	38.0212	2438.66	64.6359	116.449	Discordant
I	20	86.6169	214.066	0.404627	0.068693	0.00224142	1.43046	0.04607	0.150107	0.00156303	900	67.435	901.742	19.2566	901.566	8.77436	100.02	901.566	8.77436
II	21	310.428	260.738	1.19057	0.0735454	0.00205079	1.73307	0.049347	0.169717	0.00208559	1029.32	56.0175	1020.89	18.3464	1010.55	11.5068	101.023	1029.32	56.0175
I	22	91.0956	416.278	0.218833	0.0678053	0.00185183	1.21538	0.0353171	0.128584	0.00148684	862.65	56.3275	807.66	16.1963	779.782	8.50317	103.575	779.782	8.50317
I	23	95.343	186.593	0.510967	0.105519	0.00241556	4.26841	0.104416	0.290682	0.00343688	1724.07	42.2825	1687.29	20.1567	1644.94	17.1887	102.575	1724.07	42.2825
I	24	209.168	326.482	0.640672	0.0552784	0.00190553	0.532083	0.0186279	0.0691756	0.000697539	433.38	75.92	433.191	12.3491	431.187	4.21213	100.465	431.187	4.21213
I	25	888.975	672.247	1.32239	0.0630384	0.00157455	0.630885	0.0155286	0.0721381	0.000697813	709.27	52.9275	496.647	9.67397	449.024	4.20272	110.606	Discordant
I	26	374.213	652.848	0.573202	0.0545618	0.00138084	0.540653	0.0138116	0.0712572	0.000695717	394.495	52.7725	438.855	9.10759	443.725	4.19341	98.9024	443.725	4.19341
I	27	961.263	919.542	1.04537	0.0785983	0.00306143	0.758226	0.03086	0.0688824	0.000579816	1162.04	77.775	572.986	17.826	429.419	3.50454	133.433	Discordant
III	28	147.552	2158.56	0.0683568	0.0524909	0.00106862	0.479031	0.0100408	0.065551	0.00063368	305.615	46.2925	397.408	6.89852	409.296	3.84003	97.0955	409.296	3.84003
I	29	649.296	832.026	0.780379	0.0570134	0.00148104	0.588243	0.014602	0.074337	0.000622345	500.04	57.4025	469.745	9.34067	462.232	3.74263	101.625	462.232	3.74263
III	30	140.772	2428.17	0.0579744	0.0542165	0.00129834	0.495039	0.0117175	0.0655635	0.000521073	388.94	53.7	408.339	7.96302	409.372	3.16011	99.7476	409.372	3.16011
I	31	285.331	186.101	1.53321	0.0552678	0.00246096	0.51739	0.0240257	0.0671681	0.000866189	433.38	99.99	423.406	16.0797	419.071	5.23726	101.034	419.071	5.23726
III	32	37.091	1075.61	0.0344838	0.0513505	0.00132777	0.468247	0.0123395	0.0655032	0.000642087	257.47	63.8775	389.978	8.53761	409.007	3.89097	95.3474	409.007	3.89097
I	33	322.001	561.282	0.573689	0.05464	0.00151356	0.528976	0.0145549	0.0697803	0.000774599	398.2	56.475	431.13	9.67029	434.832	4.67357	99.1486	434.832	4.67357
II	34	105.419	338.245	0.311663	0.067084	0.00193224	1.30427	0.0377996	0.140106	0.00139693	840.43	54.63	847.607	16.6665	845.264	7.91176	100.277	845.264	7.91176
III	35	42.3607	1169.7	0.0362149	0.0549983	0.00131599	0.501872	0.0117059	0.0656579	0.000494682	413.01	49.07	412.969	7.91909	409.943	3.00063	100.738	409.943	3.00063
I	36	11.1372	687.397	0.016202	0.053682	0.00138696	0.509169	0.0132193	0.0683658	0.000695226	366.72	59.2525	417.89	8.89859	426.302	4.20124	98.0268	426.302	4.20124
I	37	79.3181	103.103	0.769306	0.0550236	0.00310531	0.508314	0.0293213	0.0669437	0.00100897	413.01	158.315	417.315	19.7409	417.716	6.10028	99.904	417.716	6.10028
II	38	830.136	459.576	1.80631	0.0554254	0.00174322	0.533283	0.0163654	0.0694446	0.000718247	427.825	65.735	433.986	10.8417	432.809	4.33576	100.272	432.809	4.33576
I	39	827.534	718.34	1.15201	0.0557103	0.00144641	0.546088	0.0140581	0.0706344	0.000593652	442.64	57.4025	442.431	9.23746	439.976	3.58234	100.558	439.976	3.58234
I	40	77.3238	686.441	0.112644	0.166832	0.00277958	11.069	0.192423	0.476926	0.00369077	2527.78	28.085	2528.96	16.2799	2513.86	16.1664	100.6	2527.78	28.085
I	41	106.03	248.985	0.425849	0.0547319	0.00206541	0.583398	0.0233396	0.0766586	0.000933931	466.71	80.5475	466.643	14.9703	476.147	5.59775	98.0039	476.147	5.59775
II	42	177.021	204.933	0.863797	0.0553457	0.00205607	0.548053	0.0207922	0.0714186	0.00100246	433.38	81.4725	443.72	13.6411	444.697	6.03631	99.7804	444.697	6.03631
II	43	546.553	269.547	2.02767	0.0507961	0.00206251	0.49722	0.0193414	0.0709228	0.000752294	231.55	62.0275	409.819	13.1199	441.713	4.53471	92.7794	441.713	4.53471
II	44	116.577	1061.71	0.109802	0.0581589	0.00143716	0.554349	0.0136892	0.0688239	0.000674473	600.025	55.55	447.842	8.9477	429.066	4.07455	104.376	429.066	4.07455
II	45	112.868	379	0.297805	0.0549807	0.00188183	0.552671	0.01974	0.0727842	0.00104176	413.01	77.77	446.745	12.9127	452.908	6.26476	98.6393	452.908	6.26476
I	46	94.8787	103.673	0.915175	0.0564935	0.00316914	0.548214	0.0320273	0.0710302	0.00129899	472.265	124.06	443.826	21.007	442.359	7.82211	100.332	442.359	7.82211
I	47	151.053	281.618	0.536375	0.159096	0.00350167	8.57436	0.19771	0.388042	0.00367903	2445.98	36.88	2293.84	21.0255	2113.74	17.1244	108.52	2445.98	36.88
I	48	109.541	153.157	0.715219	0.05557	0.00274046	0.545464	0.0278392	0.0704913	0.00099672	435.23	111.1	442.021	18.293	439.115	6.00685	100.662	439.115	6.00685
I	49	92.449	145.217	0.636625	0.0556981	0.00271209	0.544162	0.0285834	0.0702024	0.00109191	438.935	109.248	441.165	18.7978	437.375	6.58143	100.867	437.375	6.58143
II	50	60.0731	89.6349	0.670198	0.0745463	0.00416842	0.901914	0.0511186	0.0861824	0.00161461	1057.41	112.968	652.75	27.2945	532.919	9.58694	122.486	Discordant
II	51	249.138	572.587	0.435111	0.0539788	0.00152491	0.539696	0.0160611	0.0720375	0.000898259	368.57	62.9575	438.224	10.596	448.419	5.40687	97.7264	448.419	5.40687
II	52	302.788	380.501	0.795762	0.0540387	0.00182945	0.572945	0.0195503	0.0764792	0.000855382	372.275	80.5475	459.917	12.6242	475.073	5.12881	96.8099	475.073	5.12881
II	53	325.588	263.266	1.23673	0.0551314	0.00216398	0.509697	0.0201541	0.0667601	0.000807817	416.715	87.0275	418.246	13.5581	416.607	4.88681	100.393	416.607	4.88681
III	54	9.52267	661.026	0.0144059	0.0536453	0.00142737	0.48963	0.0127615	0.0656807	0.000578428	366.72	61.105	404.658	8.70303	410.081	3.50597	98.6777	410.081	3.50597
I	55	310.798	664.154	0.467961	0.054256	0.0016138	0.508781	0.0148833	0.0675057	0.000658442	388.94	66.66	417.629	10.0202	421.111	3.98267	99.1732	421.111	3.98267
I	56	307.964	551.391	0.558522	0.0556258	0.00170165	0.540705	0.0158554	0.0699571	0.000626248	438.935	68.5125	438.889	10.4536	435.897	3.78043	100.686	435.897	3.78043
I	57	23.3856	848.143	0.0275727	0.0536131	0.00145962	0.50259	0.0136037	0.0672349	0.00064717	353.76	58.3275	413.454	9.19706	419.475	3.91566	98.5647	419.475	3.91566
I	58	622.596	1914.75	0.325158	0.0563928	0.00136155	0.602972	0.0138455	0.0768182	0.000676427	477.82	53.7	479.118	8.7763	477.103	4.05765	100.422	477.103	4.05765
II	59	407.88	336.981	1.2104	0.0863906	0.00211442	2.78551	0.068308	0.231544	0.00223613	1347.21	47.685	1351.66	18.3452	1342.59	11.7273	100.676	1347.21	47.685
II	60	403.87	511.005	0.790344	0.0538198	0.00156403	0.593745	0.0171816	0.079484	0.000839621	364.87	64.8075	473.256	10.9512	493.042	5.02108	95.987	493.042	5.02108
II	61	225.179	283.178	0.795188	0.0680357	0.00298274	0.674562	0.0288841	0.0716922	0.000764443	877.775	95.3675	523.483	17.5177	446.343	4.60457	117.283	Discordant
II	62	96.2764	819.563	0.117473	0.0660259	0.00170528	1.29298	0.0347633	0.140903	0.00148841	807.1	53.6975	842.618	15.4046	849.766	8.42244	99.1588	849.766	8.42244
II	63	22.634	736.335	0.0307387	0.0552572	0.00204659	0.545064	0.0211281	0.0708752	0.000756224	433.38	81.4725	441.758	13.8882	441.426	4.55853	100.075	441.426	4.55853
I	64	185.519	371.041	0.499997	0.0589797	0.0021272	0.826148	0.0309058	0.100934	0.00120079	564.85	77.765	611.473	17.1894	619.878	7.03906	98.644	619.878	7.03906
II	65	305.692	531.191	0.575484	0.0696114	0.00252369	1.5917	0.0591736	0.164781	0.00167624	916.665	75.155	966.964	23.1925	983.293	9.29224	98.3393	983.293	9.29224
III	66	36.5948	994.751	0.0367879	0.0547771	0.00208579	0.497738	0.0199824	0.0655177	0.00087556	466.71	85.1775	410.17	13.5498	409.094	5.30177	100.263	409.094	5.30177
II	67	22.372	434.67	0.0514689	0.0668234	0.00282645	1.33189	0.0582274	0.143919	0.00175017	831.48	87.805	859.705	25.3608	866.785	9.87394	99.1832	866.785	9.87394
I	68	70.3956	236.414	0.297764	0.238546	0.00927669	18.9567	0.751557	0.573556	0.00704273	3110.18	62.5	3039.62	38.2944	2922.41	28.8952	104.011	3110.18	62.5
I	69	400.59	404.821	0.989548	0.106091	0.00361221	4.31493	0.152233	0.293395	0.00306719	1733.02	62.6575	1696.22	29.1059	1658.47	15.3134	102.276	1733.02	62.6575
I	70	1520.88	1126.83	1.34969	0.0685358	0.00211738	1.15349	0.0370032	0.121389	0.00121014	884.87	63.4225	778.889	17.4553	738.551	6.96802	105.462	738.551	6.96802
I	71	116.654	526.161	0.221707	0.227908	0.00636987	19.3009	0.62169	0.605982	0.00746136	3038.89	45.835	3056.98	31.1643	3053.89	29.9953	100.101	3038.89	45.835
I	72	92.896	239.115	0.3885	0.0582899	0.0022432	0.684186	0.0261114	0.0851113	0.000982113	538.925	89.8	529.301	15.7465	526.559	5.84145	100.521	526.559	5.84145
I	73	489.26	763.999	0.640394	0.093565	0.00230095	3.14233	0.088826	0.241667	0.00339847	1499.08	46.295	1443.12	21.7955	1395.36	17.6601	103.423	1499.08	46.295
I	74	377.196	718.929	0.524664	0.0555974	0.00154146	0.554538	0.0158228	0.0718848	0.000722742	435.23	62.9575	447.965	10.3395	447.501	4.35335	100.104	447.501	4.35335
II	75	287.518	308.864	0.930887	0.0564194	0.00201362	0.534739	0.019528	0.0684335	0.000791321	477.82	79.62	434.95	12.9231	426.711	4.78001	101.931	426.711	4.78001
I	76	381.262	1053.07	0.362047	0.0560185	0.00169076	0.569481	0.0166714	0.0733171	0.000633904	453.75	68.5125	457.679	10.7901	456.109	3.81523	100.344	456.109	3.81523
II	77	285.361	385.169	0.740872	0.054355	0.00191488	0.508947	0.0177969	0.0675456	0.000710861	387.09	79.6225	417.741	11.979	421.352	4.29859	99.143	421.352	4.29859
II	78	131.427	148.521	0.884909	0.055769	0.0031962	0.568105	0.0328974	0.0734186	0.00111849	442.64	127.765	456.788	21.304	456.719	6.72162	100.015	456.719	6.72162
I	79	86.4615	389.19	0.222157	0.0923086	0.00225066	2.76414	0.0672059	0.215465	0.00185726	1473.77	46.2975	1345.91	18.152	1257.87	9.87369	106.999	1473.77	46.2975
I	80	141.295	147.321	0.959096	0.0555191	0.00314844	0.513834	0.0278183	0.0679196	0.000882838	431.53	125.915	421.024	18.6609	423.61	5.33409	99.3895	423.61	5.33409
II	81	772.912	1549.79	0.498719	0.06244	0.00133542	0.599386	0.0139314	0.0689009	0.000720837	700.01	50.92	476.844	8.85043	429.53	4.35346	111.015	Discordant
I	82	373.917	576.092	0.649057	0.265991	0.00473267	24.472	0.439502	0.662047	0.00529346	3282.4	27.9575	3287.38	17.6618	3275.1	20.6072	100.375	3282.4	27.9575
II	83	55.1945	1150.62	0.0479695	0.0694954	0.00165704	0.88472	0.0357115	0.0883273	0.00213417	922.22	48.15	643.529	19.2444	545.637	12.6446	117.941	Discordant
I	84	226.404	262.982	0.86091	0.0560528	0.00177105	0.603162	0.0193843	0.0775645	0.000811505	453.75	70.3625	479.238	12.2816	481.569	4.8617	99.516	481.569	4.8617
I	85	216.415	498.617	0.43403	0.0558902	0.00170396	0.548064	0.0170318	0.0705865	0.00067424	455.6	66.66	443.728	11.1753	439.688	4.0668	100.919	439.688	4.0668
I	86	140.96	193.209	0.729576	0.155882	0.00326223	7.20992	0.148419	0.333352	0.00298571	2412.96	35.49	2137.73	18.4136	1854.61	14.4698	115.266	Discordant
I	87	169.198	207.401	0.815802	0.0783107	0.00202573	2.07795	0.0537798	0.191279	0.00195927	1154.63	51.8525	1141.56	17.7584	1128.3	10.6198	101.175	1154.63	51.8525
19W41 Conglomerate (GPS: N42°46’21.59”, E86°20’38.12”)
II	1	178.697	310.544	0.575433	0.0560837	0.00188644	0.565609	0.0191318	0.0729208	0.00079376	457.45	69.4375	455.171	12.4119	453.728	4.77543	100.318	453.728	4.77543
II	2	62.8691	125.53	0.500829	0.0909537	0.00235471	3.10997	0.0822683	0.246593	0.00237883	1455.56	49.5375	1435.16	20.3481	1420.88	12.3254	101.005	1455.56	49.5375
II	3	104.567	143.298	0.72972	0.0556945	0.00258406	0.536589	0.0243258	0.0698558	0.000884307	438.935	97.2125	436.173	16.0773	435.287	5.33357	100.204	435.287	5.33357
II	4	189.593	267.999	0.707441	0.0653651	0.00158996	1.16486	0.0295799	0.128482	0.00123831	787.04	45.365	784.239	13.884	779.201	7.08632	100.647	779.201	7.08632
II	5	219.017	324.98	0.67394	0.0549342	0.00178836	0.490944	0.0149172	0.06503	0.000604593	409.31	67.585	405.554	10.1629	406.143	3.66605	99.8548	406.143	3.66605
II	6	166.336	239.779	0.693706	0.106839	0.00195597	4.50652	0.0859635	0.304474	0.00281484	1745.98	33.335	1732.17	15.8951	1713.46	13.941	101.092	1745.98	33.335
II	7	97.0428	93.6369	1.03637	0.089335	0.00193632	3.0388	0.0659432	0.246114	0.00244799	1412.96	42.135	1417.42	16.6066	1418.4	12.6871	99.9308	1412.96	42.135
II	8	140.113	287.868	0.486727	0.0558362	0.00157397	0.566689	0.0163663	0.0733405	0.000701878	455.6	58.3275	455.871	10.6117	456.25	4.22263	99.9169	456.25	4.22263
II	9	359.915	468.465	0.768287	0.0548859	0.00135068	0.495115	0.012054	0.065278	0.000574884	409.31	55.55	408.391	8.191	407.644	3.48581	100.183	407.644	3.48581
II	10	229.391	440.422	0.520843	0.0549464	0.00144258	0.494925	0.0127581	0.0653366	0.000626258	409.31	63.8825	408.261	8.66997	407.999	3.79593	100.064	407.999	3.79593
II	11	239.946	297.369	0.806897	0.0785113	0.00149952	2.1308	0.0441565	0.195853	0.00182682	1161.12	38.4275	1158.85	14.3425	1153	9.86738	100.507	1161.12	38.4275
II	12	153.742	221.342	0.694593	0.0559191	0.00183176	0.538323	0.0176197	0.0698191	0.000796592	450.045	72.215	437.318	11.6338	435.066	4.80577	100.518	435.066	4.80577
II	13	222.552	243.935	0.912342	0.0909695	0.00173313	3.21397	0.0652314	0.25546	0.00273824	1455.56	37.0375	1460.53	15.7492	1466.57	14.0823	99.5883	1455.56	37.0375
II	14	150.002	220.599	0.679978	0.0562376	0.00194116	0.564837	0.0192763	0.072995	0.000848686	461.155	108.32	454.67	12.5117	454.174	5.10469	100.109	454.174	5.10469
II	15	131.694	177.786	0.740744	0.0561276	0.0021918	0.570021	0.0229326	0.0734133	0.000875114	457.45	87.03	458.028	14.8345	456.687	5.2613	100.294	456.687	5.2613
II	16	132.075	321.107	0.411312	0.0674173	0.00156606	1.29274	0.0302822	0.139045	0.00160718	849.995	-150.925	842.513	13.4233	839.257	9.10711	100.388	839.257	9.10711
II	17	349.134	177.663	1.96515	0.0646136	0.00168923	1.10416	0.029359	0.124015	0.00157582	761.115	55.55	755.36	14.1768	753.633	9.04674	100.229	753.633	9.04674
II	18	126.721	465.567	0.272187	0.0701858	0.0013042	1.5334	0.0299123	0.157877	0.00155026	1000	38.89	943.863	12.006	944.969	8.64608	99.883	944.969	8.64608
II	19	159.164	300.284	0.530046	0.0761635	0.00143452	2.02191	0.038532	0.19168	0.00157993	1099.08	37.8075	1122.9	12.9695	1130.47	8.56846	99.3305	1099.08	37.8075
II	20	222.625	232.583	0.957188	0.0543716	0.00156209	0.500851	0.0152905	0.0663879	0.000740388	387.09	64.8075	412.278	10.3484	414.357	4.4813	99.4982	414.357	4.4813
II	21	52.3977	145.033	0.36128	0.0691265	0.00200468	1.42738	0.0404912	0.149631	0.00148312	901.85	59.26	900.455	16.9487	898.896	8.33058	100.173	898.896	8.33058
II	22	106.58	96.2992	1.10676	0.0562277	0.0028349	0.538078	0.0252338	0.0701622	0.000844419	461.155	111.1	437.157	16.6611	437.133	5.09206	100.005	437.133	5.09206
II	23	76.8938	536.085	0.143436	0.0777894	0.00160148	2.00453	0.0442993	0.18523	0.00178103	1142.6	40.7425	1117.04	14.9902	1095.48	9.705	101.968	1142.6	40.7425
II	24	180.292	371.973	0.484691	0.055735	0.00158947	0.577536	0.0163084	0.0748319	0.000827118	442.64	64.8075	462.877	10.5017	465.201	4.96708	99.5003	465.201	4.96708
II	25	139.17	272.276	0.511135	0.0550619	0.00189956	0.513132	0.0177304	0.0672998	0.000823424	413.01	77.77	420.553	11.9014	419.867	4.97859	100.163	419.867	4.97859
II	26	93.4627	146.107	0.639687	0.0706304	0.00199638	1.57507	0.0447395	0.160732	0.00149744	946.29	58.1775	960.428	17.6534	960.843	8.33256	99.9568	960.843	8.33256
I	27	59.0462	352.181	0.167659	0.0902255	0.00181129	3.1294	0.0893803	0.248385	0.00448943	1431.48	70.835	1439.95	21.9996	1430.14	23.1954	100.686	1431.48	70.835
II	28	74.6592	921.243	0.0810418	0.068854	0.00125562	1.46453	0.0278689	0.153096	0.0014485	894.445	37.04	915.876	11.4988	918.292	8.11304	99.7369	918.292	8.11304
II	29	333.081	329.653	1.0104	0.0555679	0.00158454	0.53808	0.0156805	0.0697482	0.000634361	435.23	64.81	437.158	10.3559	434.638	3.82992	100.58	434.638	3.82992
II	30	47.8784	124.806	0.383624	0.135825	0.00281421	7.45063	0.157188	0.395445	0.00379409	2175.93	35.65	2167.07	18.9442	2148.03	17.5656	100.887	2175.93	35.65
II	31	257.13	503.856	0.510324	0.0550316	0.00148196	0.559437	0.0155366	0.0733654	0.00091116	413.01	59.2525	451.16	10.1209	456.399	5.47779	98.852	456.399	5.47779
II	32	118.312	191.955	0.61635	0.0550979	0.00225952	0.543869	0.0214015	0.0717408	0.000824795	416.715	92.5825	440.973	14.0787	446.635	4.96692	98.7322	446.635	4.96692
II	33	152.548	165.694	0.920659	0.0545615	0.00234653	0.510135	0.0218421	0.0677843	0.000882711	394.495	96.2875	418.54	14.6889	422.793	5.33398	98.9939	422.793	5.33398
II	34	57.8808	705.169	0.0820808	0.0701169	0.00152071	1.55264	0.0340872	0.159517	0.00131935	931.48	44.4475	951.543	13.5746	954.094	7.35309	99.7326	954.094	7.35309
I	35	55.3616	922.844	0.0599902	0.0724131	0.00146903	1.54056	0.0348038	0.152914	0.00154599	998.15	36.115	946.726	13.9249	917.28	8.65844	103.21	917.28	8.65844
II	36	26.0218	959.473	0.0271209	0.0576769	0.00121987	0.751018	0.0164319	0.0938244	0.000792409	516.705	43.515	568.815	9.53639	578.115	4.68046	98.3913	578.115	4.68046
I	37	112.691	161.277	0.69874	0.15981	0.00290601	9.77005	0.181682	0.441054	0.00368749	2453.39	25.4625	2413.33	17.2072	2355.36	16.5446	102.461	2453.39	25.4625
II	38	110.917	150.1	0.738955	0.0467006	0.00274112	0.376307	0.0223813	0.0582052	0.000709246	35.28	133.32	324.317	16.5135	364.701	4.3251	88.9268	Discordant
II	39	112.098	685.467	0.163536	0.0564217	0.00127777	0.690051	0.0158461	0.0882861	0.000691468	477.82	49.995	532.831	9.52723	545.393	4.10646	97.6967	545.393	4.10646
II	40	52.2001	58.2216	0.896576	0.0709116	0.0027279	1.59234	0.0577954	0.164161	0.0018011	954.625	77.78	967.213	22.6472	979.859	9.98743	98.7095	979.859	9.98743
II	41	80.6082	154.097	0.5231	0.0548213	0.00194254	0.505067	0.0180004	0.0664772	0.000701158	405.605	79.6225	415.127	12.1471	414.897	4.24413	100.055	414.897	4.24413
II	42	154.038	224.736	0.685415	0.0554534	0.00180958	0.530488	0.017176	0.0694506	0.000717097	431.53	67.585	432.133	11.399	432.845	4.32882	99.8357	432.845	4.32882
II	43	125.605	127.054	0.988594	0.0549486	0.00217417	0.495637	0.0200785	0.0651646	0.000715463	409.31	87.0275	408.744	13.634	406.958	4.33558	100.439	406.958	4.33558
I	44	75.2872	88.0788	0.854771	0.16306	0.00283045	10.4339	0.179076	0.462365	0.00381403	2487.34	29.015	2474.06	15.9916	2449.99	16.865	100.983	2487.34	29.015
II	45	110.226	253.329	0.435111	0.0561302	0.00152594	0.591615	0.016348	0.0761893	0.000762863	457.45	61.105	471.898	10.4343	473.337	4.57672	99.6961	473.337	4.57672
II	46	183.032	216.851	0.844047	0.160238	0.00264665	9.93371	0.162725	0.447113	0.00337868	2458.32	27.7775	2428.64	15.2018	2382.41	15.1058	101.941	2458.32	27.7775
II	47	74.5277	151.69	0.491316	0.0577779	0.00215727	0.63767	0.022872	0.0800141	0.000844989	520.41	86.0975	500.863	14.1851	496.207	5.0507	100.938	496.207	5.0507
II	48	247.711	318.671	0.777323	0.163107	0.00316599	9.73082	0.186692	0.429814	0.00355957	2487.96	32.72	2409.63	17.7412	2304.88	16.0967	104.544	2487.96	32.72
II	49	408.693	370.835	1.10209	0.0554835	0.00174991	0.547	0.0177923	0.0709588	0.000743768	431.53	70.3625	443.029	11.682	441.929	4.48331	100.249	441.929	4.48331
I	50	84.8688	178.046	0.476668	0.163939	0.00309946	9.55985	0.178372	0.419874	0.00320015	2498.15	31.7925	2393.32	17.2284	2259.91	14.5803	105.903	2498.15	31.7925
II	51	133.13	185.979	0.715837	0.054923	0.00185896	0.494933	0.0164833	0.065157	0.000682695	409.31	75.9175	408.267	11.1992	406.912	4.13756	100.333	406.912	4.13756
II	52	153.831	347.129	0.443153	0.0556501	0.00149105	0.542416	0.0140942	0.0703916	0.000661636	438.935	61.105	440.016	9.28315	438.514	3.99172	100.343	438.514	3.99172
II	53	103.548	203.608	0.508564	0.0547857	0.00191198	0.506393	0.0179348	0.0665932	0.000748858	466.71	77.77	416.021	12.0922	415.598	4.53161	100.102	415.598	4.53161
II	54	147.431	243.729	0.604895	0.0556494	0.00165403	0.545576	0.0174598	0.0703097	0.000783869	438.935	64.8075	442.094	11.4743	438.021	4.72712	100.93	438.021	4.72712
II	55	180.629	254.326	0.710227	0.0566619	0.00163252	0.583888	0.0160018	0.07444	0.000720655	479.67	64.81	466.957	10.2632	462.85	4.33099	100.887	462.85	4.33099
II	56	59.0125	135.338	0.436039	0.109542	0.00242529	4.83292	0.103351	0.317752	0.00273704	1791.66	40.435	1790.65	18.0323	1778.74	13.424	100.669	1791.66	40.435
II	57	361.877	557.667	0.648912	0.0564756	0.00131896	0.604163	0.0143214	0.0769561	0.000687855	472.265	49.995	479.872	9.07083	477.928	4.12542	100.407	477.928	4.12542
II	58	123.389	215.59	0.57233	0.0560898	0.00190862	0.57878	0.0201468	0.0742008	0.000756565	457.45	71.29	463.677	12.9611	461.415	4.54707	100.49	461.415	4.54707
II	59	57.3851	131.945	0.434918	0.0546782	0.00287046	0.515139	0.0240023	0.0678281	0.000809484	398.2	123.135	421.899	16.0879	423.058	4.89214	99.7262	423.058	4.89214
II	60	158.931	141.273	1.12499	0.0551717	0.00247259	0.530518	0.0230775	0.0695915	0.000739724	420.42	99.99	432.153	15.313	433.694	4.46446	99.6447	433.694	4.46446
II	61	36.914	133.274	0.276978	0.0556461	0.00220304	0.561281	0.022232	0.0729727	0.000834708	438.935	88.88	452.36	14.4619	454.041	5.02091	99.6298	454.041	5.02091
II	62	149.734	238.205	0.628595	0.0557365	0.00169287	0.562932	0.0163468	0.0730787	0.000680961	442.64	68.5125	453.433	10.6244	454.677	4.09816	99.7264	454.677	4.09816
II	63	207.513	285.343	0.727239	0.0552615	0.00161175	0.559929	0.0164563	0.0729346	0.000749161	433.38	60.18	451.481	10.7161	453.812	4.50778	99.4863	453.812	4.50778
II	64	238.183	251.503	0.947038	0.0778369	0.00176729	2.09386	0.0469459	0.193625	0.00168169	1142.6	44.445	1146.79	15.4271	1140.98	9.10316	100.509	1142.6	44.445
II	65	136.313	238.92	0.57054	0.0541333	0.00173886	0.539581	0.0166013	0.0723338	0.000799133	375.98	76.845	438.148	10.953	450.201	4.81019	97.3227	450.201	4.81019
II	66	283.28	363.011	0.780363	0.0556617	0.00140896	0.539099	0.0133956	0.069913	0.000639338	438.935	52.7725	437.83	8.84244	435.632	3.8593	100.505	435.632	3.8593
II	67	121.218	264.413	0.458443	0.158619	0.00259532	10.1797	0.175812	0.462234	0.00413324	2442.59	27.465	2451.23	16.0547	2449.42	18.2698	100.074	2442.59	27.465
II	68	143.586	401.549	0.357579	0.0730134	0.00133655	1.85796	0.0352914	0.183388	0.00155888	1014.5	37.5	1066.26	12.5594	1085.46	8.51208	98.2318	1014.5	37.5
II	69	210.475	397.109	0.530019	0.0539229	0.0013254	0.548904	0.014104	0.073412	0.000751273	368.57	55.55	444.278	9.25081	456.679	4.51853	97.2845	456.679	4.51853
II	70	94.0738	135.583	0.693845	0.0879758	0.00205404	2.93827	0.0683752	0.241228	0.00206188	1383.34	45.5275	1391.83	17.6542	1393.08	10.7349	99.9102	1383.34	45.5275
19W44 Sandstone (GPS: N42°47’35.52”, E86°20’33.94”)
II	1	132.935	148.168	0.897189	0.0553602	0.00242383	0.529288	0.0230436	0.0692862	0.000757988	427.825	96.2875	431.337	15.3028	431.854	4.57563	99.8804	431.854	4.57563
II	2	80.2593	174.293	0.460486	0.0558986	0.00178568	0.566171	0.0187031	0.0732949	0.000724498	455.6	70.3625	455.535	12.1296	455.976	4.35843	99.9034	455.976	4.35843
II	3	96.2205	210.654	0.45677	0.0554397	0.00182981	0.523201	0.0177322	0.0682776	0.000686357	431.53	74.065	427.287	11.8241	425.77	4.14813	100.356	425.77	4.14813
II	4	116.044	188.024	0.617176	0.0550781	0.00187965	0.502008	0.0163425	0.0663222	0.000639187	416.715	77.77	413.061	11.0513	413.96	3.87064	99.7829	413.96	3.87064
II	5	93.7652	172.672	0.543026	0.055369	0.00185645	0.528872	0.0176446	0.0693225	0.000712412	427.825	75.9175	431.06	11.7221	432.073	4.30111	99.7657	432.073	4.30111
II	6	161.259	366.09	0.440489	0.0552208	0.00158411	0.527174	0.0147096	0.0693124	0.000622063	420.42	58.3275	429.933	9.78443	432.012	3.75739	99.5188	432.012	3.75739
II	7	71.5094	161.063	0.443983	0.0589162	0.00232173	0.562233	0.0216721	0.0694147	0.000652472	564.85	89.8	452.979	14.0893	432.629	3.94002	104.704	432.629	3.94002
II	8	150.051	155.473	0.965127	0.0628898	0.0054448	0.488047	0.0397183	0.0564001	0.00124044	705.565	185.165	403.578	27.1036	353.695	7.57188	114.103	Discordant
II	9	249.485	329.958	0.75611	0.0549883	0.00178671	0.506729	0.0163343	0.0667591	0.000570938	413.01	69.4375	416.247	11.0113	416.601	3.4575	99.9151	416.601	3.4575
II	10	83.2131	152.588	0.545346	0.0550477	0.00240002	0.490935	0.0205247	0.0651881	0.000709429	413.01	93.51	405.548	13.9808	407.1	4.29902	99.6186	407.1	4.29902
II	11	128.721	348.583	0.369268	0.0557332	0.00150276	0.511411	0.013593	0.0664903	0.000583225	442.64	56.475	419.397	9.13639	414.976	3.53242	101.065	414.976	3.53242
II	12	108.578	281.139	0.386206	0.0553468	0.00192078	0.510259	0.0175545	0.0669723	0.000598486	433.38	77.77	418.623	11.8058	417.889	3.62295	100.176	417.889	3.62295
II	13	43.0529	72.032	0.597691	0.055984	0.00336725	0.501529	0.0269419	0.0661305	0.000959849	450.045	133.317	412.737	18.2211	412.801	5.80806	99.9845	412.801	5.80806
II	14	116.763	270.017	0.432428	0.0555442	0.00169785	0.514662	0.015463	0.0671622	0.000624936	435.23	68.51	421.579	10.3699	419.036	3.78183	100.607	419.036	3.78183
II	15	77.5331	138.106	0.561405	0.101542	0.00371926	1.0359	0.0377282	0.0740477	0.000811253	1653.7	68.5175	721.877	18.8229	460.496	4.87547	156.761	Discordant
II	16	64.1968	131.864	0.48684	0.0552845	0.00236571	0.526937	0.0221461	0.0694483	0.000862629	433.38	96.2875	429.775	14.7296	432.831	5.205	99.2939	432.831	5.205
II	17	71.445	178.665	0.399882	0.054638	0.00193366	0.48912	0.0166273	0.0651293	0.000640413	398.2	79.6225	404.311	11.341	406.744	3.88215	99.4017	406.744	3.88215
II	18	172.559	172.378	1.00105	0.0545648	0.00205084	0.4921	0.0181274	0.0653343	0.000593099	394.495	83.325	406.341	12.3389	407.985	3.59564	99.597	407.985	3.59564
II	19	110.575	179.676	0.615413	0.0547608	0.00254228	0.493856	0.023091	0.0651991	0.000701798	466.71	103.692	407.535	15.6975	407.167	4.25286	100.09	407.167	4.25286
II	20	69.8895	147.154	0.47494	0.0693559	0.00413327	0.815535	0.0520156	0.0855224	0.00229476	909.26	122.22	605.554	29.0939	529.001	13.6305	114.471	Discordant
II	21	216.67	379.633	0.570734	0.0544192	0.00147336	0.499479	0.0136093	0.0664276	0.000673174	387.09	63.8825	411.35	9.21988	414.597	4.0754	99.2167	414.597	4.0754
II	22	56.4699	204.336	0.276358	0.0554572	0.00201963	0.513891	0.0192136	0.0669363	0.000688039	431.53	81.475	421.062	12.89	417.671	4.16324	100.812	417.671	4.16324
I	23	226.755	547.436	0.414212	0.162885	0.00278029	10.6322	0.192319	0.47087	0.00412928	2487.03	29.0125	2491.53	16.8729	2487.37	18.1473	100.167	2487.03	29.0125
II	24	139.752	305.751	0.457078	0.0552021	0.00195905	0.514032	0.0173681	0.0676287	0.000716368	420.42	79.6225	421.157	11.6514	421.854	4.33147	99.8348	421.854	4.33147
II	25	131.821	395.722	0.333115	0.054871	0.0014226	0.508428	0.0131296	0.0668849	0.000547779	405.605	59.255	417.391	8.84265	417.361	3.31749	100.007	417.361	3.31749
II	26	74.9162	80.5954	0.929533	0.0561758	0.00291767	0.528359	0.0274554	0.0685498	0.000923712	461.155	116.655	430.72	18.2427	427.413	5.57741	100.774	427.413	5.57741
II	27	64.8212	243.282	0.266444	0.0546203	0.00179231	0.497348	0.0159545	0.0658832	0.000582724	398.2	78.695	409.905	10.8227	411.305	3.53128	99.6597	411.305	3.53128
II	28	203.899	283.502	0.719215	0.0546399	0.00188031	0.515258	0.0175877	0.068162	0.000582774	398.2	77.77	421.979	11.7891	425.073	3.52455	99.2721	425.073	3.52455
II	29	52.5291	128.574	0.408553	0.0553795	0.0024773	0.50795	0.0222528	0.066673	0.000764863	427.825	99.99	417.07	14.9867	416.08	4.62789	100.238	416.08	4.62789
II	30	17.8694	61.2574	0.29171	0.0647665	0.00717204	0.520331	0.0571723	0.0579137	0.00165989	768.52	230.537	425.373	38.1848	362.925	10.1165	117.207	Discordant
II	31	84.1523	134.605	0.625179	0.0541795	0.00237939	0.492917	0.0219757	0.0657521	0.00078296	388.94	99.99	406.896	14.949	410.512	4.74107	99.1192	410.512	4.74107
II	32	78.8688	172.309	0.457718	0.055479	0.002278	0.525959	0.0221381	0.0683522	0.000757097	431.53	87.955	429.124	14.7337	426.22	4.5741	100.681	426.22	4.5741
II	33	275.238	279.773	0.983791	0.0547609	0.0023921	0.490154	0.0204069	0.064867	0.000671455	466.71	98.14	405.015	13.9079	405.157	4.07069	99.9651	405.157	4.07069
II	34	64.5203	176.788	0.364958	0.0529619	0.00208367	0.486512	0.0178381	0.0671623	0.000694746	327.835	88.88	402.531	12.1876	419.037	4.20285	96.061	419.037	4.20285
II	35	126.602	181.053	0.699256	0.0551905	0.0022109	0.504331	0.0186235	0.0667886	0.000820619	420.42	88.88	414.63	12.5735	416.779	4.96396	99.4844	416.779	4.96396
II	36	164.849	370.584	0.444836	0.0559926	0.00176522	0.571583	0.0183223	0.0739149	0.000862932	453.75	65.735	459.038	11.842	459.699	5.18589	99.8563	459.699	5.18589
II	37	54.9248	125.124	0.438963	0.0551705	0.0024448	0.525815	0.0223793	0.0694002	0.000772973	420.42	99.99	429.028	14.8956	432.541	4.66538	99.1879	432.541	4.66538
II	38	54.341	388.154	0.139998	0.0549997	0.00151518	0.50807	0.0138446	0.0667418	0.000530116	413.01	61.105	417.151	9.32591	416.496	3.21143	100.157	416.496	3.21143
II	39	753.988	1156.45	0.651987	0.0541919	0.00120507	0.507088	0.0110536	0.0675492	0.000437819	388.94	49.995	416.489	7.45262	421.373	2.65355	98.8408	421.373	2.65355
II	40	245.432	217.061	1.1307	0.0632139	0.00294422	0.543107	0.0230479	0.0624017	0.00106824	716.675	99.99	440.471	15.1687	390.215	6.48525	112.879	Discordant
II	41	51.3402	140.613	0.365117	0.0552458	0.00238307	0.509685	0.021333	0.0670259	0.000801743	420.42	96.2875	418.238	14.3509	418.213	4.84897	100.006	418.213	4.84897
II	42	70.2152	149.217	0.470556	0.0547209	0.00253429	0.503409	0.0240962	0.0663106	0.000737659	466.71	103.692	414.008	16.2767	413.89	4.46514	100.028	413.89	4.46514
II	43	114.527	232.141	0.493348	0.0547219	0.00182126	0.51082	0.0160786	0.0676995	0.000609158	466.71	74.0675	419.001	10.8098	422.281	3.68496	99.2232	422.281	3.68496
II	44	92.2465	128.803	0.716183	0.0552018	0.00258186	0.511035	0.0225379	0.0673316	0.000712528	420.42	99.065	419.145	15.1476	420.059	4.30947	99.7823	420.059	4.30947
II	45	159.672	211.915	0.753473	0.0547601	0.00212165	0.513374	0.0155103	0.067753	0.000613204	466.71	82.4	420.716	10.4104	422.604	3.70916	99.5531	422.604	3.70916
II	46	99.0109	236.082	0.419392	0.0548843	0.00187434	0.515437	0.0173099	0.067758	0.000587874	409.31	77.77	422.099	11.6017	422.634	3.55652	99.8733	422.634	3.55652
I	47	64.1722	131.952	0.486331	0.0560395	0.00234811	0.560722	0.0226738	0.0728552	0.000899435	453.75	87.955	451.996	14.7544	453.335	5.40993	99.7047	453.335	5.40993
II	48	97.2043	109.897	0.884508	0.0562715	0.00263527	0.575317	0.0257318	0.0744836	0.000924601	464.86	99.065	461.447	16.5886	463.111	5.55282	99.6407	463.111	5.55282
II	49	47.8234	104.943	0.455709	0.0554994	0.00274262	0.535453	0.0261388	0.0697298	0.000864253	431.53	111.1	435.422	17.2879	434.528	5.21345	100.206	434.528	5.21345
II	50	65.2505	171.042	0.381487	0.0557357	0.00224583	0.531978	0.0212524	0.0689912	0.00075115	442.64	88.88	433.121	14.089	430.075	4.53567	100.708	430.075	4.53567
II	51	101.116	197.715	0.511422	0.0542383	0.00210252	0.497884	0.0189277	0.0664477	0.000751133	388.94	82.4	410.269	12.8337	414.719	4.54593	98.9271	414.719	4.54593
II	52	137.26	284.114	0.483116	0.0557338	0.0016104	0.564899	0.0160053	0.0732472	0.000826547	442.64	64.8075	454.71	10.3896	455.69	4.97071	99.7851	455.69	4.97071
II	53	78.2952	124.443	0.629167	0.0551974	0.00238163	0.526629	0.0220198	0.0691098	0.000748765	420.42	100.915	429.57	14.6486	430.79	4.52082	99.7167	430.79	4.52082
II	54	91.1875	233.766	0.390081	0.0545494	0.001757	0.514673	0.0167135	0.0678581	0.000619606	394.495	72.215	421.587	11.2078	423.239	3.74739	99.6097	423.239	3.74739
II	55	392.885	308.77	1.27242	0.0550816	0.00174108	0.51313	0.0153302	0.0673355	0.000618336	416.715	70.3625	420.552	10.2913	420.083	3.74147	100.112	420.083	3.74147
II	56	68.6987	282.651	0.243051	0.0548862	0.00158957	0.49902	0.0142655	0.0655232	0.000596147	409.31	64.8075	411.039	9.667	409.127	3.61345	100.467	409.127	3.61345
II	57	161.236	185.9	0.867328	0.0551867	0.00222556	0.505633	0.0192457	0.0664055	0.000673831	420.42	88.88	415.509	12.9822	414.464	4.07945	100.252	414.464	4.07945
II	58	120.43	280.371	0.429539	0.0547049	0.00158077	0.504732	0.0145443	0.0663946	0.000549742	466.71	60.18	414.901	9.81842	414.398	3.33075	100.121	414.398	3.33075
II	59	89.2758	183.034	0.487755	0.0548325	0.00200692	0.513136	0.0183371	0.0675163	0.000637097	405.605	83.325	420.556	12.3084	421.175	3.85396	99.8531	421.175	3.85396
II	60	46.7271	90.7527	0.514884	0.0548444	0.0028897	0.492964	0.0257596	0.065359	0.000925261	405.605	118.507	406.928	17.5216	408.134	5.60303	99.7045	408.134	5.60303
I	61	266.603	443.796	0.600734	0.161654	0.00273764	10.2922	0.164977	0.457771	0.00295899	2473.14	28.705	2461.4	14.9286	2429.71	13.1506	101.305	2473.14	28.705
II	62	157.314	224.282	0.701409	0.0566099	0.00226246	0.542136	0.0211337	0.0693774	0.000778616	475.97	87.0275	439.832	13.9182	432.403	4.69945	101.718	432.403	4.69945
II	63	83.565	348.143	0.240031	0.0553758	0.00185554	0.522742	0.0166627	0.0681404	0.000609333	427.825	75.9175	426.981	11.1147	424.943	3.68458	100.48	424.943	3.68458
II	64	117.406	186.292	0.630228	0.0552636	0.00216994	0.512389	0.0189146	0.0671555	0.000630474	433.38	88.88	420.055	12.702	418.996	3.81525	100.253	418.996	3.81525
II	65	128.584	265.759	0.483839	0.0549462	0.00183918	0.499925	0.0162387	0.0659443	0.000700136	409.31	75.9175	411.652	10.9965	411.675	4.23998	99.9944	411.675	4.23998
II	66	127.562	401.793	0.317483	0.0545524	0.0014228	0.510673	0.0131156	0.0677206	0.000659439	394.495	52.7725	418.901	8.82013	422.408	3.98792	99.1698	422.408	3.98792
II	67	102.5	227.783	0.449991	0.0551993	0.00176635	0.508385	0.0160773	0.0666679	0.000586625	420.42	76.845	417.363	10.8263	416.05	3.55238	100.316	416.05	3.55238
II	68	163.027	256.156	0.636437	0.0550292	0.001634	0.513711	0.0147198	0.0678016	0.00064526	413.01	66.66	420.942	9.87803	422.897	3.90218	99.5375	422.897	3.90218
II	69	71.5243	136.431	0.524253	0.0553249	0.00226328	0.520883	0.0214172	0.0677541	0.000778058	433.38	95.36	425.741	14.3017	422.611	4.70295	100.741	422.611	4.70295
II	70	178.069	364.71	0.488249	0.0551239	0.00146236	0.524048	0.0140227	0.0687757	0.000527686	416.715	54.625	427.852	9.34704	428.775	3.1912	99.7846	428.775	3.1912
JT57-9 Sandstone (GPS: N42°47’17”, E86°20’06”)
II	1	180.17	336.46	0.535487	0.05632	0.00108	0.56128	0.0098	0.07228	0.00083	465	20	452	6	450	5	100.444	450	5
II	2	123.62	243.98	0.506681	0.05503	0.00151	0.48305	0.01216	0.06366	0.00091	413	32	400	8	398	6	100.503	398	6
II	3	81.14	143.54	0.565278	0.12783	0.002	3.56484	0.04918	0.20224	0.0026	2068	11	1542	11	1187	14	174.221	Discordant
II	4	86.35	120.88	0.714345	0.05571	0.00305	0.5323	0.02714	0.06929	0.00165	441	71	433	18	432	10	100.231	432	10
II	5	158.75	324.74	0.488853	0.05652	0.00263	0.54131	0.02314	0.06945	0.00154	473	56	439	15	433	9	101.386	433	9
II	6	198.31	258.15	0.768197	0.05635	0.00175	0.55387	0.01589	0.07129	0.00111	466	37	448	10	444	7	100.901	444	7
II	7	74.33	231.88	0.320554	0.05541	0.00231	0.53542	0.02063	0.07008	0.00136	429	52	435	14	437	8	99.5423	437	8
II	8	101.22	474.86	0.213158	0.05573	0.00197	0.52722	0.01708	0.0686	0.00122	442	41	430	11	428	7	100.467	428	7
II	9	385.88	366.28	1.05351	0.05482	0.00231	0.50559	0.01964	0.06688	0.00134	405	52	415	13	417	8	99.5204	417	8
II	10	194.01	362.83	0.534713	0.05754	0.00143	0.62785	0.0143	0.07912	0.00109	512	27	495	9	491	7	100.815	491	7
II	11	46.02	100.05	0.45997	0.05472	0.00278	0.51654	0.02451	0.06846	0.00151	401	67	423	16	427	9	99.0632	427	9
II	12	50.8	125.42	0.405039	0.05548	0.00283	0.53631	0.02521	0.0701	0.00167	432	63	436	17	437	10	99.7712	437	10
II	13	141.33	250.96	0.563157	0.05608	0.00149	0.58573	0.01434	0.07574	0.00108	456	30	468	9	471	6	99.3631	471	6
II	14	139.45	305.67	0.456211	0.05475	0.00156	0.54928	0.01441	0.07275	0.00106	402	33	445	9	453	6	98.234	453	6
II	15	75.33	162.48	0.463626	0.07126	0.00145	1.58774	0.0296	0.16158	0.00213	965	19	965	12	966	12	99.8965	966	12
II	16	41.83	146.84	0.284868	0.0557	0.00262	0.51311	0.02245	0.06679	0.00141	440	60	421	15	417	9	100.959	417	9
II	17	273.29	371.06	0.736512	0.05758	0.00381	0.6269	0.03801	0.07895	0.00249	514	79	494	24	490	15	100.816	490	15
II	18	87.46	132.55	0.659826	0.05468	0.00303	0.48012	0.02476	0.06367	0.00154	399	73	398	17	398	9	100	398	9
II	19	274.79	485.49	0.566005	0.0576	0.0011	0.6014	0.0105	0.07571	0.00089	515	19	478	7	470	5	101.702	470	5
II	20	240.95	652.68	0.36917	0.07137	0.00092	1.63019	0.01912	0.16562	0.00172	968	11	982	7	988	10	99.3927	988	10
II	21	53.16	93.42	0.569043	0.0556	0.00404	0.53678	0.03601	0.07001	0.0023	436	92	436	24	436	14	100	436	14
II	22	69.2	177.65	0.38953	0.05552	0.00216	0.52227	0.01866	0.06821	0.0013	433	46	427	12	425	8	100.471	425	8
II	23	79.5	108.78	0.730833	0.0553	0.00307	0.54695	0.02828	0.07171	0.00176	424	72	443	19	446	11	99.3274	446	11
II	24	116.87	131.99	0.885446	0.0559	0.00263	0.52523	0.0229	0.06813	0.00146	448	59	429	15	425	9	100.941	425	9
II	25	29.9	74.18	0.403074	0.05524	0.00338	0.5231	0.02978	0.06866	0.00181	422	80	427	20	428	11	99.7664	428	11
II	26	262.7	334.2	0.786056	0.05643	0.00154	0.61767	0.01541	0.07936	0.00116	469	30	488	10	492	7	99.187	492	7
II	27	140	115.16	1.2157	0.05505	0.00488	0.52097	0.04295	0.06862	0.0026	414	117	426	29	428	16	99.5327	428	16
II	28	64.97	169.62	0.383033	0.05584	0.00257	0.53112	0.02268	0.06897	0.00145	446	58	433	15	430	9	100.698	430	9
II	29	196.73	260.35	0.755637	0.0563	0.00155	0.59669	0.01515	0.07684	0.00111	464	32	475	10	477	7	99.5807	477	7
II	30	142.8	139.55	1.02329	0.05443	0.00263	0.49905	0.02239	0.06648	0.00144	389	62	411	15	415	9	99.0361	415	9
II	31	123.24	352.3	0.349815	0.0545	0.00238	0.4672	0.01873	0.06216	0.00131	392	53	389	13	389	8	100	389	8
II	32	30.44	43.27	0.70349	0.05515	0.00622	0.53374	0.05689	0.07017	0.00301	418	162	434	38	437	18	99.3135	437	18
II	33	139.71	287.21	0.486438	0.05622	0.0016	0.55103	0.01437	0.07107	0.00106	461	32	446	9	443	6	100.677	443	6
II	34	94.81	181.8	0.521507	0.05683	0.00219	0.55095	0.01951	0.0703	0.00132	485	46	446	13	438	8	101.826	438	8
II	35	181.94	353.88	0.514129	0.05671	0.00162	0.59588	0.01558	0.07619	0.00115	480	32	475	10	473	7	100.423	473	7
II	36	46.3	68.56	0.675321	0.05503	0.00501	0.50607	0.04378	0.06668	0.00219	413	135	416	30	416	13	100	416	13
II	37	104.87	159.96	0.655601	0.05667	0.00271	0.60243	0.02659	0.07708	0.00173	479	58	479	17	479	10	100	479	10
II	38	226.45	299.44	0.756245	0.05486	0.0031	0.54213	0.02809	0.07165	0.00191	407	69	440	18	446	11	98.6547	446	11
II	39	52.01	104.24	0.498945	0.05536	0.00457	0.49825	0.03861	0.06526	0.00215	427	114	411	26	408	13	100.735	408	13
II	40	193.87	193.67	1.00103	0.05525	0.0032	0.54551	0.02907	0.0716	0.00193	422	72	442	19	446	12	99.1031	446	12
II	41	141.12	181.79	0.77628	0.05711	0.00232	0.62706	0.02352	0.07962	0.00154	496	49	494	15	494	9	100	494	9
II	42	216.83	216.49	1.00157	0.05676	0.00558	0.60494	0.05474	0.07729	0.00349	482	122	480	35	480	21	100	480	21
II	43	181.76	309.67	0.586947	0.05755	0.00446	0.64826	0.04605	0.08168	0.003	513	93	507	28	506	18	100.198	506	18
II	44	38.82	87.59	0.443201	0.056	0.0071	0.5182	0.06053	0.0671	0.00379	452	161	424	40	419	23	101.193	419	23
II	45	88.19	130.33	0.676667	0.0589	0.00413	0.70106	0.04535	0.08631	0.00281	563	85	539	27	534	17	100.936	534	17
II	46	22.85	88.01	0.25963	0.05672	0.00873	0.59917	0.08522	0.07661	0.00523	481	197	477	54	476	31	100.21	476	31
II	47	143.33	416.9	0.343799	0.05743	0.00273	0.65965	0.02867	0.0833	0.00196	508	55	514	18	516	12	99.6124	516	12
II	48	130.05	294.59	0.441461	0.05838	0.00442	0.70875	0.04928	0.08805	0.00318	544	90	544	29	544	19	100	544	19
II	49	441.7	415.47	1.06313	0.05448	0.00446	0.58882	0.04422	0.07837	0.00299	391	101	470	28	486	18	96.7078	486	18
II	50	64.82	163.3	0.396938	0.0565	0.00453	0.62347	0.04585	0.08002	0.00303	472	97	492	29	496	18	99.1935	496	18
II	51	107.22	153.38	0.699048	0.0559	0.0037	0.62362	0.03793	0.08091	0.00252	448	81	492	24	502	15	98.008	502	15
II	52	195.29	267.14	0.73104	0.05716	0.00267	0.64696	0.02799	0.08209	0.0018	498	57	507	17	509	11	99.6071	509	11
II	53	122.42	188.99	0.647759	0.05562	0.00573	0.53166	0.05023	0.06932	0.00327	437	128	433	33	432	20	100.231	432	20
II	54	90.9	76.2	1.19291	0.06437	0.00492	1.20496	0.08637	0.13576	0.00471	754	93	803	40	821	27	97.8076	821	27
II	55	75.04	118.29	0.634373	0.06013	0.006	0.75628	0.06929	0.09121	0.00433	608	118	572	40	563	26	101.599	563	26
II	56	50.75	114.01	0.445136	0.0584	0.00522	0.70624	0.05819	0.08771	0.00364	545	109	543	35	542	22	100.185	542	22
II	57	32.87	94.6	0.347463	0.05561	0.00654	0.54997	0.05996	0.07173	0.00366	437	153	445	39	447	22	99.5526	447	22
II	58	51.52	105.33	0.489129	0.05516	0.0067	0.50867	0.05775	0.06689	0.00332	419	166	418	39	417	20	100.24	417	20
II	59	39.22	61.71	0.635553	0.05834	0.00774	0.69789	0.08572	0.08677	0.00514	543	167	538	51	536	30	100.373	536	30
II	60	110.53	162.24	0.681275	0.05816	0.00483	0.66161	0.05039	0.08251	0.00323	536	100	516	31	511	19	100.978	511	19
II	61	15.14	47.36	0.319679	0.05648	0.00849	0.5619	0.0785	0.07215	0.00461	471	198	453	51	449	28	100.891	449	28
* Age concordance is reported by (207Pb/235U age)/(206Pb/238U age)*100 if 206Pb/238U age <1000 Ma, otherwise by (207Pb/206Pb age)/(206Pb/238U age)*100.
# Preferred age for analyses with concordance between 90 and 110 is determined by 206Pb/238U age if it is younger than 1000 Ma, otherwise by 207Pb/206Pb age. Discordant analyses are excluded for age spectra plot.
